A240

**TITLE :** HEMODYNAMIC EFFECTS OF DOBUTAMINE DURING SEPTIC SHOCK TREATED BY NOREPINEPHRINE.  
**AUTHORS :** Y. Blanloeil, M.D., C. Lejus, M.D., T. Francois, M.D., P. Michel, M.D., M. Pinaud, M.D., Ph. D.  
**AFFILIATION:** Dpts of Anesth., Hôpital R.G Laennec and Hôtel-Dieu, 44035 Nantes, France.

After failure of volume expansion and dopamine infusion in septic shock, norepinephrine (NOR) is administered to restore mean arterial pressure (MAP).<sup>1</sup> Because of myocardial depression during septic shock, dobutamine (DOB) could increase cardiac index (CI) and hence oxygen delivery (DO<sub>2</sub>).<sup>2</sup> The aim of our study was to investigate the hemodynamic effects of DOB in patients with septic shock already treated by NOR.

**Methods:** After approval of local Ethic Committee ten patients with septic shock aged 62 ± 13 yrs (mean ± S.D.), were included in this study. Dose of NOR was 1.48 ± 0.54 µg.kg.<sup>-1</sup>.min<sup>-1</sup> to maintain MAP between 70 and 90 mmHg. Hemodynamic parameters were measured and calculated before DOB infusion (0), after increasing doses of DOB (5, 7.5, 10, 15 µg.kg.<sup>-1</sup>.min<sup>-1</sup>) and 15 min after DOB was stopped (0bis). During DOB infusion, volume expansion (Albumin 4%) maintained baseline filling pressures. Values were expressed as mean ± SD. Statistics were ANOVA followed by Scheffe-F-test. p<0.05 was considered as significant.

**Results:** They are summarized on the table. DOB at 10 µg.kg.<sup>-1</sup>.min<sup>-1</sup> decreased systemic vascular resistances (SVRI). At this dose, heart rate (HR) greatly increased in 2 patients with atrial fibrillation in one. In all patients but these two, lowering of SVRI was maintained at 15 µg.kg.<sup>-1</sup>.min<sup>-1</sup>. Volume expansion during DOB infusion was 1011 ± 195 ml. When DOB was stopped, pulmonary wedge pressure (Pwp) was higher than before DOB was started. All the other hemodynamic parameters remained unchanged (table).

**Conclusion :** DOB did not increase CI, DO<sub>2</sub> and oxygen consumption (VO<sub>2</sub>). DOB induced arrhythmias. We concluded that DOB offered no advantages when CI is maintained at its upper limits with NOR during septic shock.

**References:** 1. Ann. Int. Med, 113 : 227-242, 1990.  
2. Am. Rev. Respir. Dis., 142 : 2-7, 1990.

| DOB µg.kg. <sup>-1</sup> .min <sup>-1</sup>                          | 0                      | 5                      | 7.5                    | 10          | 15 (n=8)    | 0bis       |
|----------------------------------------------------------------------|------------------------|------------------------|------------------------|-------------|-------------|------------|
| HR b.min <sup>-1</sup>                                               | 115 ± 15               | 121 ± 17               | 122 ± 16               | 130 ± 23    | 126 ± 18    | 116 ± 21   |
| MAP mmHg                                                             | 78 ± 6                 | 71 ± 13                | 74 ± 16                | 69 ± 14     | 73 ± 13     | 78 ± 12    |
| Pwp mmHg                                                             | 7.9 <sup>+</sup> ± 0.7 | 7.4 <sup>+</sup> ± 2.1 | 7.3 <sup>+</sup> ± 1.9 | 8.1 ± 2     | 8.3 ± 1.7   | 9.9 ± 1.7  |
| CI l.min <sup>-1</sup> .m <sup>-2</sup>                              | 4.8 ± 1.5              | 4.7 ± 1.4              | 5.2 ± 1.4              | 5.0 ± 1.6   | 5.4 ± 1.4   | 4.9 ± 1.6  |
| SVRI dynes.cm <sup>-5</sup> .m <sup>-2</sup>                         | 1285 ± 341             | 1169 ± 326             | 1106 ± 397             | 1026* ± 215 | 1019* ± 247 | 1217 ± 345 |
| VO <sub>2</sub> mlO <sub>2</sub> .min <sup>-1</sup> .m <sup>-2</sup> | 154 ± 40               | 147 ± 51               | 164 ± 39               | 145 ± 41    | 145 ± 37    | 157 ± 36   |
| DO <sub>2</sub> mlO <sub>2</sub> .min <sup>-1</sup> .m <sup>-2</sup> | 685 ± 178              | 643 ± 174              | 697 ± 163              | 639 ± 198   | 683 ± 174   | 632 ± 177  |
| Lactates mmol.l <sup>-1</sup>                                        | 4.9 ± 2.4              | 4.8 ± 2.6              | 4.6 ± 2.6              | 4.7 ± 2.7   | 5.0 ± 3.1   | 4.4 ± 2.6  |

moy ± SD; \* p<0.05 vs 0; <sup>+</sup> p<0.05 vs 0 bis.

A241

**Title:** NOREPINEPHRINE (NOR) VS EPINEPHRINE (EPI) IN SEPTIC SHOCK.  
**Authors:** T. François, M.D., Y. Blanloeil, M.D., C. Lejus, M.D., P. Michel, M.D., M. Pinaud, M.D., Ph.D.  
**Affiliation:** Département d'Anesthésie - Hôpital G et R Laennec 44035 Nantes cedex 01 - FRANCE.

After failure of volume expansion and dopamine infusion in septic shock, NOR is administered to restore mean arterial pressure (MAP).<sup>1</sup> EPI has been recently advocated for this purpose instead of NOR.<sup>2,3</sup> This study was designed to compare NOR with EPI and to show if the latter may improve oxygen uptake (VO<sub>2</sub>) by improving oxygen delivery (DO<sub>2</sub>).

**Methods:** After approval of our local Ethic Committee, 16 patients with septic shock were included (age 63±13 yr, mean±SD). The following hemodynamic parameters were collected: HR, MAP, diastolic arterial pressure (DAP), RAP, PWP, CI, VO<sub>2</sub> and DO<sub>2</sub> were calculated from hemodynamic and metabolic data. Arterial lactate were measured. Patients were randomized in two groups, to receive firstly NOR (group I) or EPI (group II). After at least 1 to 3 hours of hemodynamic stability with either NOR or EPI, hemodynamic and metabolic parameters were recorded (T0). Then in group I EPI was substituted to NOR and inversely in group II. After one hour of cardiovascular stability, similar recordings were done. Values are expressed as means ± SD, comparison within groups were made with paired Student t test.

**Results:** Mean doses of catecholamines (in µg.kg.<sup>-1</sup>.min<sup>-1</sup>) were: in group I, NOR: 1.55±0.8, EPI: 0.89±0.7, in group II, EPI: 0.82±0.6, NOR: 1.37±0.7. Main results are summarized for 14 patients in the table. Two patients in group I were excluded because of atrial fibrillation after substitution by EPI.

|                                                       | NOR Gr I | EPI Gr I  | EPI GR II | NOR GR II |
|-------------------------------------------------------|----------|-----------|-----------|-----------|
| HR b/min                                              | 100±18   | 111±18 ** | 115±19    | 108±13    |
| CI l.min <sup>-1</sup> .m <sup>-2</sup>               | 3.4±0.9  | 4.5±2 *   | 4.8±1.8   | 5.2±1.6   |
| MAP mmHg                                              | 76±11    | 71±11     | 76±12     | 79±10     |
| DAP mmHg                                              | 59±10    | 52±9 *    | 52±10     | 59±7 +    |
| PWP mmHg                                              | 10.6±3   | 10±2      | 11.7±4    | 8.6±3 +   |
| DO <sub>2</sub> ml.min <sup>-1</sup> .m <sup>-2</sup> | 430±140  | 577±290 * | 585±166   | 644±167   |
| VO <sub>2</sub> ml.min <sup>-1</sup> .m <sup>-2</sup> | 121±47   | 120±58    | 160±29    | 156±19    |
| Lactate mmol/l                                        | 6±4.4    | 7.6±5     | 5.1±2.6   | 5.1±2.2   |

\* p<0.05 and \*\* p<0.01 EPI vs NOR in group I, + p<0.05 NOR vs EPI in group II.

**Conclusion:** EPI after NOR in group I resulted in significant increases in HR and CI due to β adrenergic effect without improvement in VO<sub>2</sub> despite increase in DO<sub>2</sub>; the latter phenomenon was observed by <sup>3</sup> but not by <sup>2</sup>. The low DAP observed in both group under EPI was probably due to a vasoconstriction relatively less important with EPI than with NOR. It could be detrimental for organ perfusion especially for coronary and cerebral perfusion. Thus, there is no evidence for EPI use (lower DAP, arrhythmogenicity) during septic shock in the absence of severe cardiogenic impairment.

**References:** 1. Ann. Int. Med., 113, 227-242, 1990.  
2. Chest, 98, 949-953, 1990.  
3. Intens. Care. Med.; 17, 36-39, 1991.
